# Supplementary material for: Nuclear Heparanase Regulates Chromatin Remodeling, Gene Expression and PTEN Tumor Suppressor Function
Source: MDPI journal article supplement (doi:10.3390/cells9092038), 2020-09-06
Supplement: s1 [file s1]

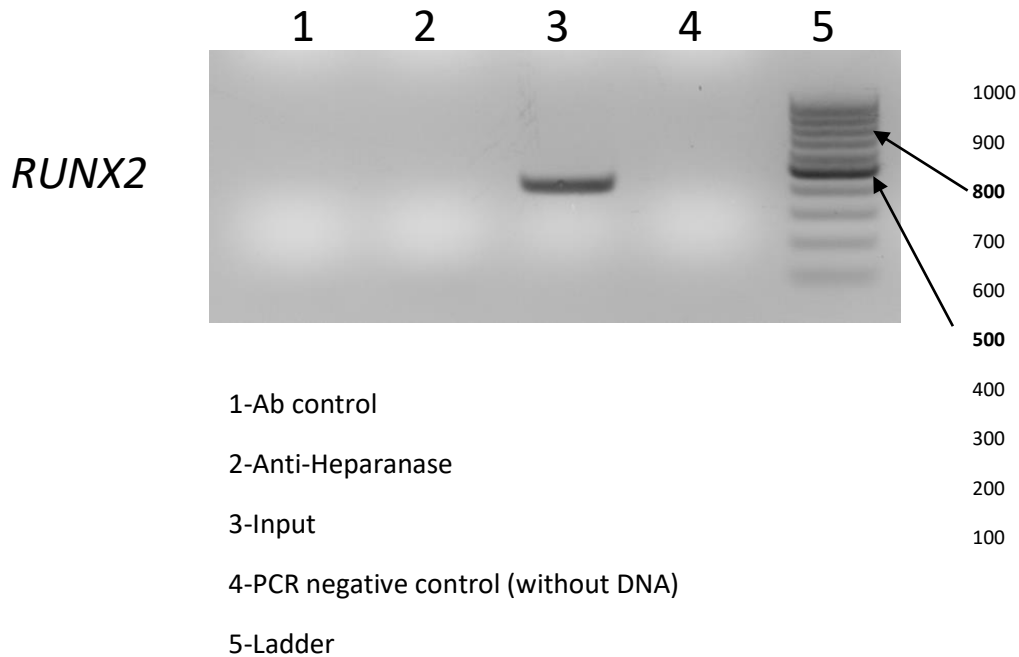

**Figure S1: HPSE binding to promoter region of *RUNX2* gene analysis by ChIP assay.** Chromatin immunoprecipitation assay was performed on CAG HPSE high cells to analyze HPSE binding to promoter region of *RUNX2*. PCR was performed using primers probing the promoter regions of *RUNX2* gene after pulldown with an antibody control (Ab, line 1) or anti-heparanase (line 2). Input (Line 3) was used as positive control of design primers for *RUNX2* promoter genes and line 4 was used a negative control of PCR quality and specificity.

A

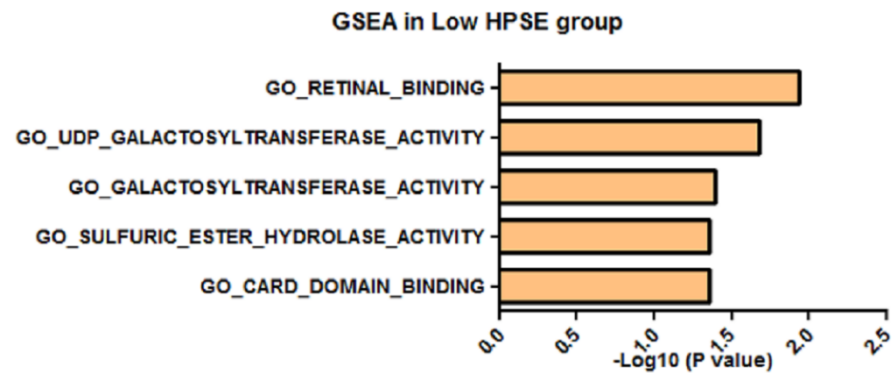

B

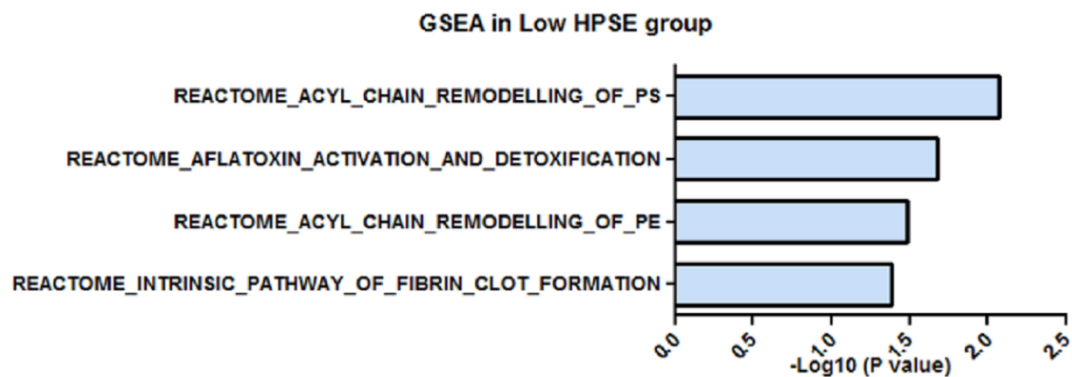

**Figure S2:** Top significant genes enriched in HPSE low patient group.

**A**-GSEA performed on HPSE low patient group and analyzed for set of genes related to biological process dataset. **B**-Top significant genes from Reactome gene sets enriched in HPSE low patient group performed by GSEA tool. Each signature was ranked by  $-\log_{10}$  P value.
